# Supplementary material
Source: Springer Nature journal article supplement (https://www.springermedizin.de/resource/supplementary/13012_2006_855_MOESM2_ESM.pdf/9629490)

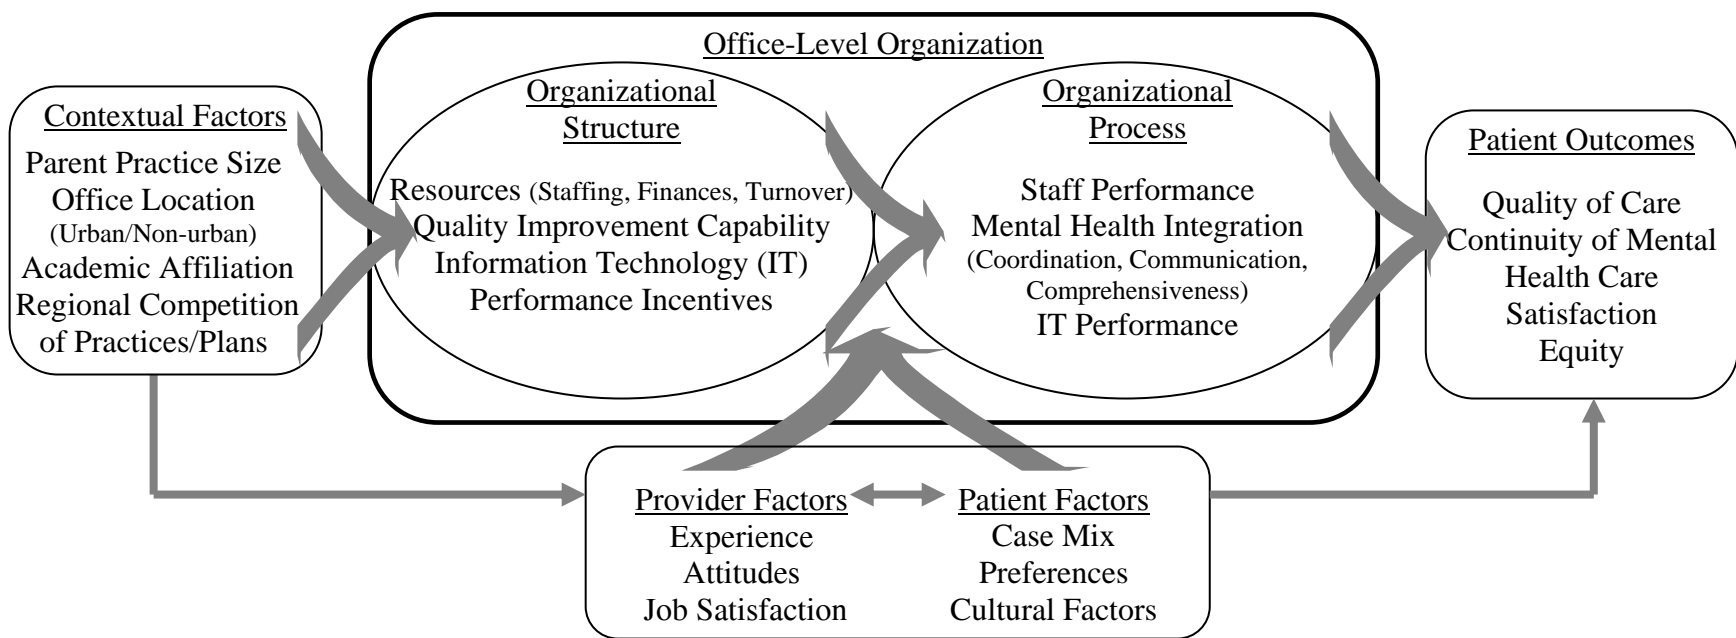

Supplement: MOESM2 [file 9629490]
